# Supplementary material for: Novel AuCl3–thiourea catalyst with a low Au content and an excellent catalytic performance for acetylene hydrochlorination
Source: Royal Society of Chemistry journal article supplement (doi:10.1039/c5cy01943e), 2016-01-01
Supplement: c5cy01943e1.pdf [file c5cy01943e1.pdf]

**Novel AuCl<sub>3</sub>–thiourea catalyst with a low Au content and an excellent  
catalytic performance for acetylene hydrochlorination**

Xue Yin <sup>a</sup>, Chaofeng Huang <sup>a</sup>, Lihua Kang <sup>a</sup>, Mingyuan Zhu <sup>a,b\*</sup>, Bin Dai <sup>a,b</sup>

<sup>a</sup> School of Chemistry and Chemical Engineering of Shihezi University, Shihezi,  
Xinjiang, 832000, RP China.

<sup>b</sup> Key Laboratory for Green Processing of Chemical Engineering of Xinjiang  
Bingtuan, Shihezi, Xinjiang, 832000, RP China.

Corresponding author Tel.: +86 993 2057270; Fax: +86 993 2057210.

E-mail address: [zhuminyuan@shzu.edu.cn](mailto:zhuminyuan@shzu.edu.cn) (M. Zhu)

## Supplementary Information

### Table of contents:

#### Catalyst characterization

Fig. S1. TGA curves of 0.4% $\text{AuCl}_3$ -0.75%T/AC catalysts in oxygen atmosphere.

Fig.S2. TGA curves of (a) fresh 0.4% $\text{AuCl}_3$ /AC, (b) used 0.4% $\text{AuCl}_3$ /AC, (c) fresh 0.4% $\text{AuCl}_3$ -0.75%T/AC and (d) used 0.4% $\text{AuCl}_3$ -0.75%T/AC catalysts in oxygen atmosphere.

Table S1. Pore structure parameters of the 0.4% $\text{AuCl}_3$ -0.75%T/AC and 0.4% $\text{AuCl}_3$ /AC catalysts.

Table S2. Screening of initial catalytic conversion and selectivity of acetylene in 1 h.

## Catalyst characterization

For the TEM experiment, a JEM-2010 electron microscope with an accelerating voltage of 200 kV, a line resolution of 0.14 nm, and a point-to-point resolution of 0.23 nm was used. XRD data were collected on a Bruker Advance D8 X-ray diffractometer using Cu-K $\alpha$  irradiation ( $\lambda = 1.5406 \text{ \AA}$ ) as a source at 40 kV and 40 mA in the scanning range of  $2\theta$  between  $20^\circ$  and  $90^\circ$ . XPS data were recorded on a Thermo ESCALAB 250XI experiment with a monochromatized Al, K $\alpha$  X-ray source (225 W), minimum energy resolution of 0.45 eV (Ag 3d<sub>5/2</sub>), and minimum XPS analysis area of 3  $\mu\text{m}$ . The obtained spectra were analyzed using XPS peak software. A TPR experiment was carried out on an Auto Chem 2720 instrument. The catalysts were pretreated by passing through high-purity N<sub>2</sub> (50 mL/min) at 100 °C for 30 min and then heated at a rate of 10 K/min from 50 °C to 600 °C. TPD was also analyzed using an Auto Chem 2720 instrument. The samples were pretreated under hydrogen chloride atmosphere at a reactive temperature of 170 °C for 4 h, and then high-purity N<sub>2</sub> (50 mL/min) was passed through the sample at 100 °C for 30 min. The sample was heated at a rate of 10 °C/min from 100 °C to 600 °C to collect the data. TGA of the samples was conducted in a TGDSC simultaneous thermal analyzer (NETZSCH STA 449F3 Jupiter1, Germany). A 7 mg sample was used and heated to 900 °C in oxygen atmosphere at a flow rate of 30 mL/min and a heating rate of 10 °C/min.

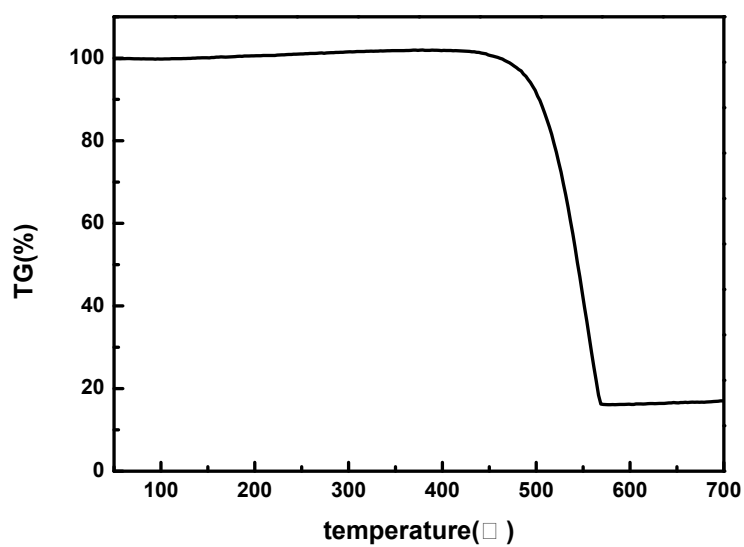

Fig. S1. TGA curves of the 0.4%AuCl<sub>3</sub>-0.75%T/AC complex at a heating rate of 20 K/min under in O<sub>2</sub> atmosphere.

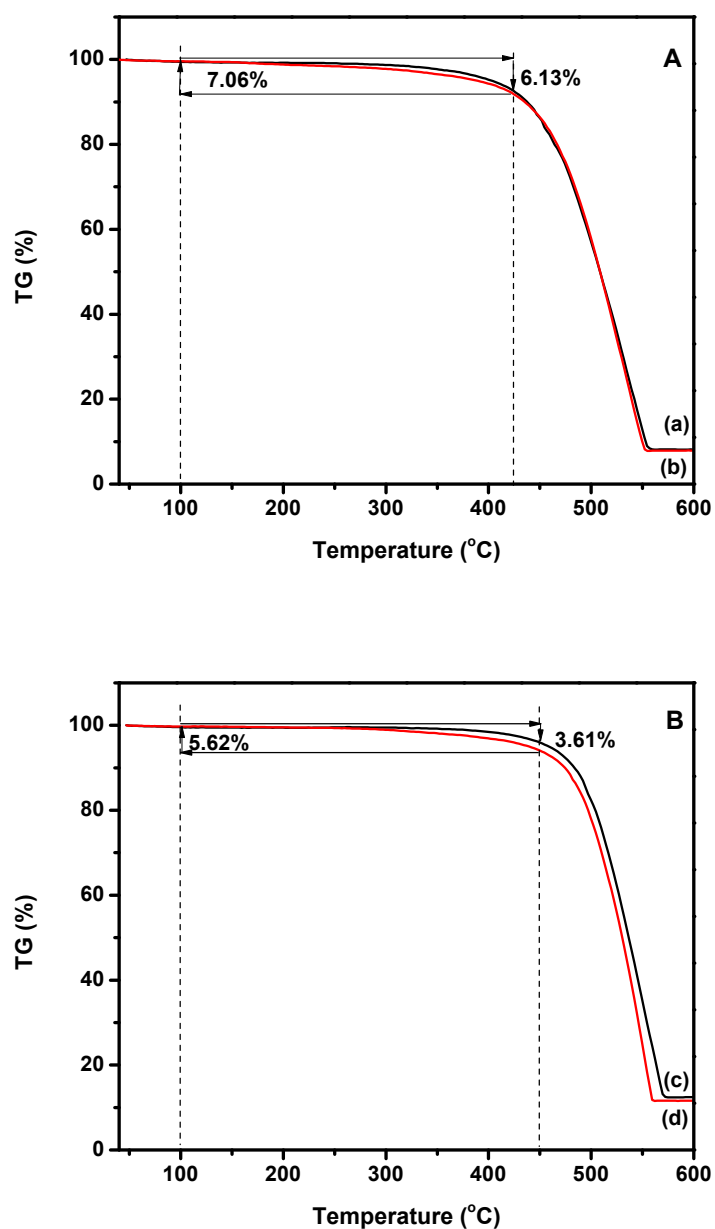

Fig. S2. TGA curves of (a) fresh 0.4%AuCl<sub>3</sub>/AC, (b) used 0.4%AuCl<sub>3</sub>/AC, (c) fresh 0.4%AuCl<sub>3</sub>-0.75%T/AC and (d) used 0.4%AuCl<sub>3</sub>-0.75%T/AC catalysts in oxygen atmosphere.

Table S1. Pore structure parameters of the 0.4% $\text{AuCl}_3$ -0.75%T/AC and 0.4% $\text{AuCl}_3$ /AC catalysts.

| Catalyst                        | $S_{\text{BET}}$ ( $\text{m}^2/\text{g}$ ) | Pore volume ( $\text{cm}^3/\text{g}$ ) |
|---------------------------------|--------------------------------------------|----------------------------------------|
|                                 | Fresh                                      | Fresh                                  |
| 0.4% $\text{AuCl}_3$ /AC        | 961                                        | 0.56                                   |
| 0.4% $\text{AuCl}_3$ -0.75%T/AC | 973                                        | 0.55                                   |

Table S2. Screening of initial catalytic conversion and selectivity of acetylene in 1 h.

| Catalyst                         | Conversion (%) | Selectivity (%) |
|----------------------------------|----------------|-----------------|
| 0.4% $\text{AuCl}_3$ /AC         | 33.26          | 99.87           |
| 0.4% $\text{AuCl}_3$ -0.375%T/AC | 73.16          | 99.94           |
| 0.4% $\text{AuCl}_3$ -0.75%T/AC  | 77.45          | 99.95           |
| 0.4% $\text{AuCl}_3$ -1.5%T/AC   | 70.81          | 99.96           |
